# Supplementary material
Source: Research Square preprint supplement (doi:10.21203/rs.3.rs-9411534/v1)
Supplement: Supplementary file 1 [file b556ece18b8adecdfb7a0ab2.docx]

Supplementary Table 1 Composition and nutrient level of the experimental diets (%)

| **Ingredients** | **Content（%）** | **Nutrient level** | **Contents** |
| --- | --- | --- | --- |
| Corn | 29.23 | DE, Mcal/kg | 3.54 |
| Extruded corn | 30.32 | CP, % | 18.46 |
| Soybean meal | 8.01 | Ca, % | 0.75 |
| Extruded soybean | 7.06 | Total phosphorus, % | 0.56 |
| Fish meal | 4.00 | AP, % | 0.37 |
| Whey powder | 5.00 | SID Lys, % | 1.31 |
| Broken rice | 3.82 | SID Met, % | 0.38 |
| Soybean protein concentrate | 6.40 | SID Thr, % | 0.76 |
| Soybean oil | 1.92 | SID Trp, % | 0.21 |
| Sucrose | 2.00 |  |  |
| Limestone | 0.62 |  |  |
| Dicalcium phosphate | 0.46 |  |  |
| NaCl | 0.20 |  |  |
| L-Lys.HCl | 0.36 |  |  |
| DL-Met | 0.07 |  |  |
| L-Thr | 0.02 |  |  |
| L-Trp | 0.01 |  |  |
| Chloride choline | 0.15 |  |  |
| Vitamin premix1 | 0.05 |  |  |
| Mineral premix2 | 0.30 |  |  |
| Total | 100.00 |  |  |

1 The vitamin premix provides the diet (per kg) with 9000 IU VA, 3000 IU VD3, 20 IU VE, 3 mg VK3, 1.5 mg VB1, 4 mg VB2, 3 mg VB6, 0.02 mg VB12, 30 mg niacin, 15 mg pantothenic acid, 0.75 mg folic acid, and 0.1 mg biotin.

2 The mineral premix prodies the diet (per kg) with 100.0 mg Fe, 6.0 mg Cu, 100.0 mg Zn, 4.0 mg Mn, 0.14 mg I, 0.3 mg Se.

Supplementary Table 2 Sequences of primers and probes for qPCR

| **Gene** | **Primer sequence (5’ –3’)** |
| --- | --- |
| *β-Actin* | F: TGGAACGGTGAAGGTGACAGC |
| R: GCTTTTGGGAAGGCAGGGACT |
| *ZO-1* | F: TGGCATTATTCGCCTTCATAC |
| R:ATCGATATGGAGGAGGTGATATGG |
| *Claudin-1* | F: TCTTAGTTGCCACAGCATGG |
| R:CCAGTGAAGAGAGCCTGACC |
| *Occludin* | F: CTACTCGTCCAACGGGAAAG |
| R:ACGCCTCCAAGTTACCACTG |
| *FATP-1* | F:GGAGTAGAGGGCAAAGCAGG |
| R:AGGTCTGGCGTGGGTCAAAG |
| *SGLT-1* | F: GCAACAGCAAAGAGGAGCGTAT |
| R:GCCACAAAACAGGTCATAGGTC |
| *GLUT-2* | F: GACACGTTTTGGGTGTTCCG |
| R:GAGGCTAGCAGATGCCGTAG |
| *PETP1* | F: AAGATGAAATGTGAGCGTATGGG |
| R:TTACTCGGCTGGTTTTTTGAGTG |
| *PBD3* | F: CCTTCTCTTTGCCTTGCTCTT |
| R: GCCACTCACAGAACAGCTACC |
| *PBD114* | F: TGGTGGATCCTGAACGATGCT |
| R: AAACGCCCTCTGAATGCAGC |
| *Arpc2* | F: GTGCTCGGGACAATACCATCAA |
| R: CCCGCATACGTGTGTGAATATAGG |
| *ARPC3* | F: AGATGAAGTGATGAGGGCCTATTT |
| R: TCCACCACTTGCTGGGTTTAT |
| *WASL* | F: TCACCTTCCTCGGCAAGAAAT |
| R: CAAGACAAGCAACACCACTACAC |
| *ITGA5* | F: CAGACAACTTCACCCGGATTCT |
| R: TTGGTGAACTCGGCACTGAA |
| *ITGB1* | F: ACTCGGTGAATGGGAACAATGA |
| R: AGCAACCACACCAGCTACAA |
| *vcl* | F: CAAAGGCTGTGGCAGGAAAC |
| R: CAGGCTCCTGAGGTTGGAAG |
